# Supplementary material
Source: publisher figshare collection journal article supplement (https://acs.figshare.com/ndownloader/files/5700978)
Supplement: Supplementary file 1 [file 5700978]

**Ferromagnetic ordering and metamagnetism in malonate bridged 3D diamond-like and honeycomb-like networks:  $[\text{Cu}(\text{mal})(\text{DMF})]_n$  and  $\{[\text{Cu}(\text{mal})(0.5\text{pyz})]\cdot\text{H}_2\text{O}\}_n$  (mal = malonate dianion, DMF = *N,N*-dimethylformamide, pyz = pyrazine)**

Tian-Fu Liu,<sup>†</sup> Hao-Ling Sun,<sup>†</sup> Song Gao,<sup>\*,†</sup> Shi-Wei Zhang<sup>†</sup> and Tai-Chu Lau<sup>\*,‡</sup>

**Supporting materials**

**Synthesis of 1 and 2:**

Caution: Whilst no problems were encountered in the course of this work, perchlorate mixtures are potentially explosive and should therefore be handled with appropriate care.

Synthesis of the compound 1  $[\text{Cu}(\text{mal})(\text{DMF})]_n$ . An aqueous solution of Malonic acid (0.104 g, 1 mmol, 10 ml) and sodium hydroxide (0.080 g, 2 mmol) was mixed with an aqueous solution of copper(II) perchlorate (0.372 g, 1 mmol, 10 ml). After 30 min stirred, 20 ml DMF (dimethyl formamide) was added to the mixture. Deep-blue prismatic single crystals were obtained after three days (Yield 53%). *Anal. Calc.* for  $\text{C}_6\text{H}_9\text{NO}_5\text{Cu}$ : C, 30.16; H, 3.77; N, 5.87. Found: C, 30.23; H, 3.68; N, 5.90%; IR (KBr  $\text{cm}^{-1}$ ) 1657(m), 1618(m), 1588(m), 1566(s); 1442(m), 1368(m), 1356(m); 737(w), 701(w).

Compound 2  $[\text{Cu}(\text{mal})(0.5\text{pyz})]\cdot\text{H}_2\text{O}$ : An aqueous solution of sodium malonate (1 mmol, 10 ml) was mixed with an aqueous solution of copper perchlorate (1 mmol, 10 ml). After 30 min stirred, a DMF solution of pyrazine (1 mmol, 5ml) was added to the mixture. Deep blue block single crystals were obtained after one months (Yield 43%). *Anal. Calc.* for  $\text{C}_{10}\text{H}_{12}\text{N}_2\text{O}_{10}\text{Cu}_2$ : C, 26.84; H, 2.68; N, 6.26%. Found: C, 26.74; H, 2.92; N, 6.08. IR (KBr  $\text{cm}^{-1}$ ) 3599(w), 3444(w), 1582(vs), 1565(vs), 1457(w), 1428(w), 1376(m).

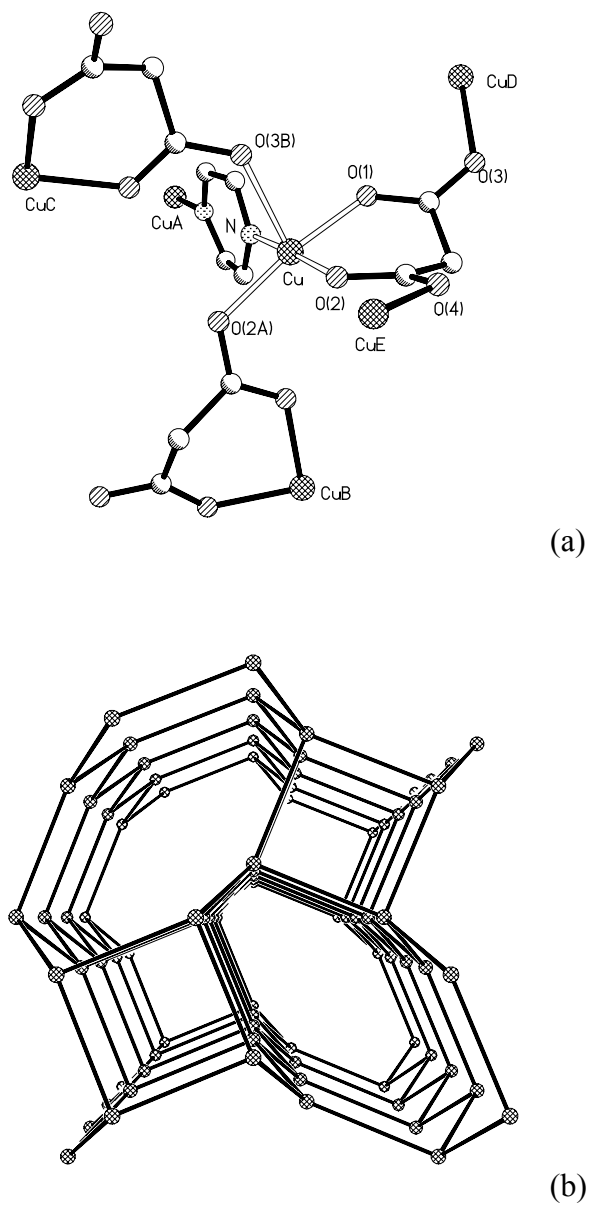

**Figure S1.** (a) An ORTEP drawing of **2** (Hydrogen atoms are omitted for clarity); (b) Projection of **2** from *c*-axis formed by copper ions.

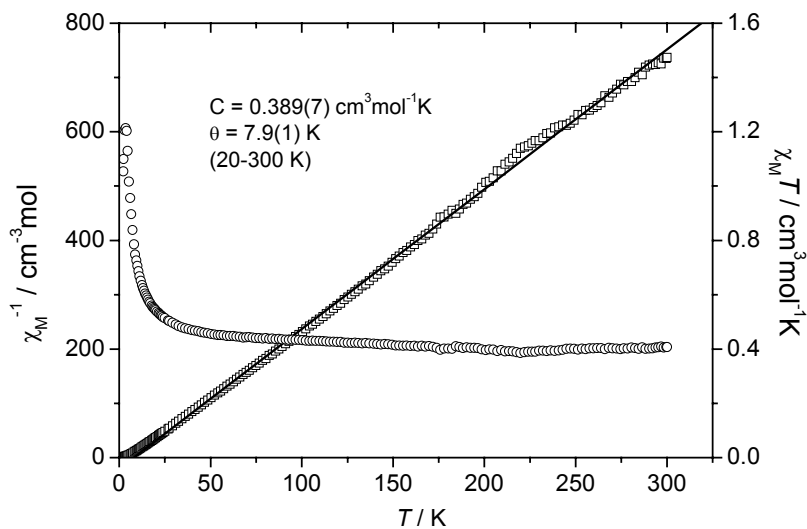

**Figure S2.** Temperature dependence of  $\chi_M T$  and  $\chi_M^{-1}$  of **1** at 10 kOe field. The solid line represents the best fit to the Curie-Weiss expression.

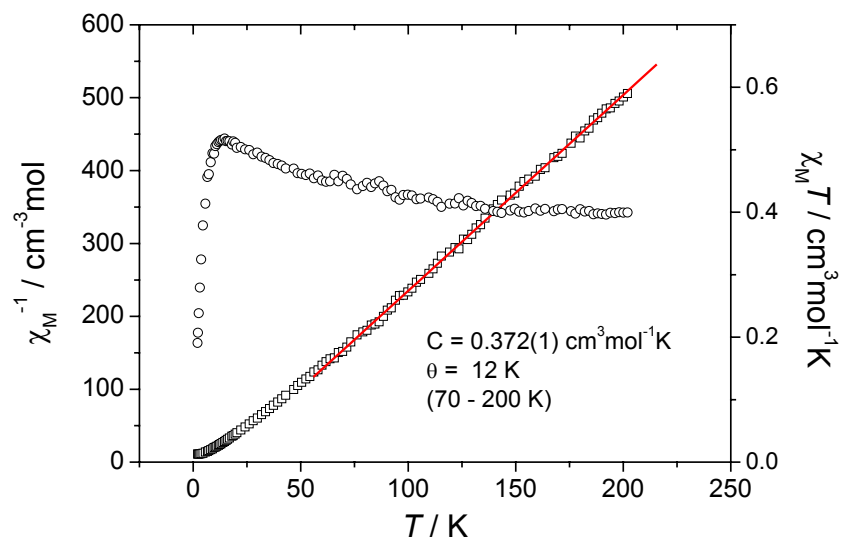

**Figure S3.** Temperature dependence of  $\chi_M T$  and  $\chi_M^{-1}$  of **2** at 20 kOe field. The solid line represents the best fit to the Curie-Weiss expression.

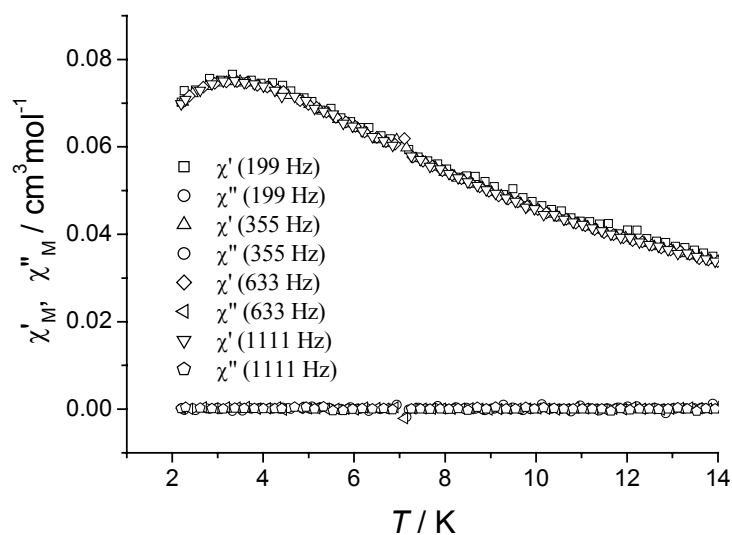

**Figure S4.** Real ( $\chi_M'$ ) and imaginary ( $\chi_M''$ ) *ac* magnetic susceptibilities as a function of temperature in zero applied *dc* field and an *ac* field of 2 Oe at different frequencies (199, 355, 633, 1111 Hz) for **2**.

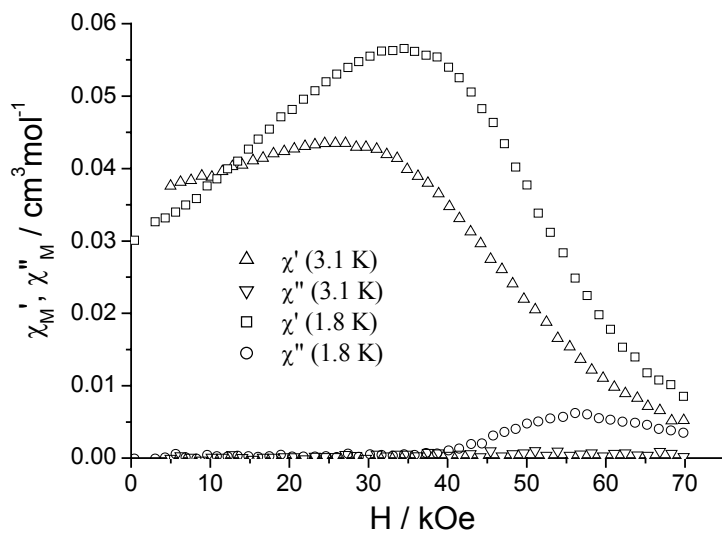

**Figure S5.** Real ( $\chi_M'$ ) and imaginary ( $\chi_M''$ ) *ac* magnetic susceptibilities as a function of field are taken at 1.8 K and 3.1 K for **2**.
